# Supplementary material for: High rate of antibiotic resistance among pneumococci carried by healthy children in the eastern part of the Democratic Republic of the Congo
Source: Springer Nature journal article supplement (doi:10.1186/s12887-018-1332-3), 2018-11-19
Supplement: MOESM1 [file 16279776]

## Additional File 1:

*Socio-demographic factors as reported by the parents*

| Characteristics              |                                      | N     | %    |
|------------------------------|--------------------------------------|-------|------|
| <b>Health centre (n=794)</b> | Kadutu (urban)                       | 99    | 12   |
|                              | Kaziba (rural)                       | 109   | 14   |
|                              | Malkiya wa Amani<br>(urban)          | 100   | 13   |
|                              | Muhanzi (urban)                      | 106   | 13   |
|                              | Muku (rural)                         | 119   | 15   |
|                              | Nyantende (rural)                    | 126   | 16   |
|                              | Panzi (suburban)                     | 135   | 17   |
|                              | <b>Location of residence (n=794)</b> | Urban | 304  |
|                              | Rural                                | 355   | 44.7 |
|                              | Suburban                             | 135   | 17.0 |
| <b>Sex (n=794)</b>           | Female                               | 392   | 49.4 |
| <b>Age (months) (n=794)</b>  | < 6                                  | 302   | 38.0 |
|                              | 6 - 12                               | 184   | 23.2 |
|                              | > 12 - 24                            | 125   | 15.7 |

|                                    |                             |     |      |
|------------------------------------|-----------------------------|-----|------|
|                                    | > 24 – 60                   | 183 | 23.1 |
| <b>Nutritional status (n=794)</b>  | Undernutrition <sup>1</sup> | 286 | 36.0 |
| <b>Mother's occupation (n=284)</b> | Agriculture                 | 197 | 69.4 |
|                                    | Self-employed               | 61  | 21.4 |
|                                    | Employed                    | 25  | 8.8  |
|                                    | Unknown                     | 1   | 0.4  |
| <b>Father's occupation (n=284)</b> | Agriculture                 | 113 | 39.8 |
|                                    | Self-employed               | 109 | 38.4 |
|                                    | Employed                    | 34  | 12.0 |
|                                    | Unknown                     | 21  | 7.4  |
|                                    | Other jobs                  | 7   | 2.4  |
| <b>Mother's education (n=284)</b>  | No education                | 149 | 52.4 |
|                                    | Primary school              | 65  | 22.9 |
|                                    | Secondary school            | 65  | 22.9 |
|                                    | Occupational studies        | 4   | 1.4  |
|                                    | University                  | 1   | 0.4  |
| <b>Father's education (n=284)</b>  | No education                | 67  | 23.6 |
|                                    | Primary school              | 98  | 34.5 |
|                                    | Secondary school            | 85  | 30.0 |

|                                                                     |                      |     |      |
|---------------------------------------------------------------------|----------------------|-----|------|
|                                                                     | Occupational studies | 23  | 8.1  |
|                                                                     | University           | 11  | 3.9  |
| <b>Number of rooms in the house<br/>(n=284)</b>                     | 0-1                  | 91  | 32.0 |
|                                                                     | 2-3                  | 160 | 56.4 |
|                                                                     | > 3                  | 33  | 11.6 |
| <b>People living in the house (n=284)</b>                           | 0-4                  | 30  | 10.6 |
|                                                                     | 5-7                  | 133 | 46.8 |
|                                                                     | > 7                  | 121 | 42.6 |
| <b>People sleeping in the same room as<br/>the child (n=284)</b>    | 1 - 2                | 31  | 10.9 |
|                                                                     | 3 - 4                | 218 | 76.8 |
|                                                                     | > 4                  | 35  | 12.3 |
| <b>Children &lt; 5 years of age living in<br/>the house (n=284)</b> | 0-2                  | 47  | 16.6 |
|                                                                     | 3-4                  | 221 | 77.8 |
|                                                                     | > 4                  | 16  | 5.6  |
| <b>Siblings (n=284)</b>                                             | 0-2                  | 80  | 28.2 |
|                                                                     | 3-4                  | 103 | 36.2 |

|                                                          |                   |     |      |
|----------------------------------------------------------|-------------------|-----|------|
|                                                          | >4                | 101 | 35.6 |
| <b>Having animals in the house</b><br><b>(n=284)</b>     |                   | 32  | 11.2 |
| <b>Partly breastfeeding (months)</b><br><b>(n=284)</b>   | < 6               | 7   | 2.5  |
|                                                          | 7-12              | 38  | 13.4 |
|                                                          | 12-24             | 165 | 58.1 |
|                                                          | > 24              | 74  | 26.0 |
| <b>Kitchen (n=284)</b>                                   | Enclosed in house | 77  | 27.1 |
| <b>Most important fuel for cooking</b><br><b>(n=284)</b> | Wood              | 180 | 63.4 |
|                                                          | Charcoal          | 94  | 33.1 |
|                                                          | Electricity       | 10  | 3.5  |
| <b>Most used stove for cooking</b><br><b>(n=284)</b>     | Free stones       | 179 | 63.0 |
|                                                          | Charcoal stove    | 94  | 33.1 |
|                                                          | Grid electric     | 11  | 3.9  |
| <b>Parental tobacco smoking (n=284)</b>                  |                   | 11  | 3.9  |
| <b>Immunisation BCG<sup>2</sup> (n = 794)</b>            |                   | 783 | 98.6 |
| <b>Immunisation HiB<sup>3</sup> (n = 772)</b>            | None              | 55  | 71.2 |

|                                         |                                     |     |      |
|-----------------------------------------|-------------------------------------|-----|------|
|                                         | 1 dose                              | 77  | 10.0 |
|                                         | 2 or 3 doses                        | 641 | 83.0 |
| <b>Immunisation PCV13</b>               | None (n= 772)                       | 331 | 42.9 |
|                                         | 1 dose (n = 772)                    | 159 | 20.6 |
|                                         | 2 or 3 doses (n =645 <sup>4</sup> ) | 283 | 43.9 |
| <b>Immunisation measles (n = 431)</b>   |                                     | 343 | 79.6 |
| <b>Ongoing symptoms (n=284)</b>         | Fever <sup>5</sup>                  | 22  | 7.7  |
|                                         | Chills                              | 21  | 7.4  |
|                                         | Cough                               | 88  | 31.0 |
|                                         | Runny nose                          | 25  | 8.8  |
| <b>Past history of disease (n=284)</b>  | Malaria                             | 44  | 15.5 |
|                                         | Gastroenteritis                     | 41  | 14.4 |
|                                         | Neonatal problems                   | 51  | 18.0 |
|                                         | Asthma/bronchiolitis                | 14  | 4.9  |
|                                         | Other diseases <sup>6</sup>         | 31  | 10.9 |
|                                         | HIV                                 | 0   | 0    |
|                                         | Tuberculosis                        | 0   | 0    |
|                                         | Heart disease                       | 0   | 0    |
| <b>Previous hospitalisation (n=284)</b> |                                     | 74  | 26.0 |

---

<sup>1</sup> Undernutrition defined as weight for age or weight for height as a Z score  $\leq -2$  standard deviations, determined by ENA for smart software 2011 [26],

<sup>2</sup> BCG =Bacillus Calmette–Guérin vaccine, <sup>3</sup> HiB=*Haemophilus influenzae* type B vaccine,

<sup>4</sup> 645 = the number of children that were supposed to be given  $\geq 2$  doses of PCV13 when they were older than 10 weeks or two and a half months,

<sup>5</sup> Fever = 37.5-39.0°C),

<sup>6</sup> Other diseases = genetic disorders (sickle cell disease n= 2, Down syndrome n=1), cerebral palsy n=3
