# Supplementary material for: High rate of antibiotic resistance among pneumococci carried by healthy children in the eastern part of the Democratic Republic of the Congo
Source: Springer Nature journal article supplement (doi:10.1186/s12887-018-1332-3), 2018-11-19
Supplement: MOESM4 [file 16279776]

Additional File 4

Socio-demographic factors of the children in relation to nasopharyngeal pneumococcal carriage

| Socio-demographic factors                   |                            | N (%)   | Pneumococcal carriage N (%) | OR (95% CI)     | <i>p</i> -value |
|---------------------------------------------|----------------------------|---------|-----------------------------|-----------------|-----------------|
| <b>Sex (n=794)</b>                          | <b>Female</b>              | 392(49) | 72(18)                      | 1.00            |                 |
|                                             | <b>Male</b>                | 402(51) | 91(23)                      | 1.30(0.92-1.84) | 0.13            |
| <b>Age (n=794)</b>                          | <b>&lt; 6 months</b>       | 302(38) | 29(9.6)                     | 1.00            |                 |
|                                             | <b>6 – 12 Months</b>       | 184(23) | 46(25)                      | 1.41(0.85-2.36) | 0.170           |
|                                             | <b>&gt; 12 – 24 months</b> | 125(16) | 32(26)                      | 2.12(1.25-3.62) | 0.005           |
|                                             | <b>&gt; 24 – 60 months</b> | 183(23) | 56(31)                      | 3.45(2.19-5.44) | <0.0001         |
| <b>Location of residence (n=794)</b>        | <b>Urban</b>               | 304(38) | 40(13)                      | 1.00            |                 |
|                                             | <b>Rural</b>               | 355(45) | 98(28)                      | 2.51(1.67-3.77) | <0.0001         |
|                                             | <b>Sub- Urban</b>          | 135(17) | 25(19)                      | 1.50(0.86-2.59) | 0.146           |
| <b>Number of rooms in the house (n=284)</b> | <b>0-1 room</b>            | 91(32)  | 19(21)                      | 1.00            |                 |
|                                             | <b>2-3 rooms</b>           | 160(56) | 47(29)                      | 1.57(0.85-2.89) | 0.141           |
|                                             | <b>&gt; 3rooms</b>         | 33(12)  | 11(33)                      | 1.89(0.78-4.58) | 0.15            |
| <b>People living in the house (n=284)</b>   | <b>0-4</b>                 | 30(11)  | 9(29)                       | 1.00            |                 |
|                                             | <b>5-7</b>                 | 133(47) | 40(30)                      | 1.00(0.42-2.38) | 0.998           |

|                                                                          |                              |         |        |                  |         |
|--------------------------------------------------------------------------|------------------------------|---------|--------|------------------|---------|
|                                                                          | > 7                          | 121(43) | 28(23) | 0.70(0.28-1.70)  | 0.430   |
| <b>People sleeping in the same room as the child<sup>2</sup> (n=284)</b> | 1 – 2                        | 31(11)  | 3(9.7) | 1.00             |         |
|                                                                          | > 3                          | 253(89) | 74(29) |                  | 0.018   |
| <b>Children &lt; 5 years of age living in the house (n=284)</b>          | 0-2                          | 47(17)  | 13(28) | 1.00             |         |
|                                                                          | 3-4                          | 221(78) | 58(26) | 0.93(0.45-1.88)  | 0.09    |
|                                                                          | > 4                          | 16(5.6) | 6(38)  | 1.56(0.47-5.19)  | 0.46    |
| <b>Siblings (n=284)</b>                                                  | 0-2                          | 80(28)  | 27(34) |                  | 0.197   |
|                                                                          | 3-4                          | 103(36) | 29(28) |                  | 0.430   |
|                                                                          | 5-6                          | 79(28)  | 17(22) |                  | 0.990   |
|                                                                          | > 6                          | 22(7.7) | 4(18)  | 1.00             |         |
| <b>Having animal in the house (n=284)</b>                                |                              | 32(11)  | 7(22)  | 0.47(0.30-1.76)  | 0.48    |
| <b>Breast feeding (n=284)</b>                                            | < 6 Months                   | 7(2.5)  | 1(14)  | 1.00             |         |
|                                                                          | 7-12 Months                  | 38(13)  | 11(29) | 2.44(0.26-22.73) | 0.43    |
|                                                                          | 12-24 months                 | 166(58) | 44(27) | 2.16(0.25-18.48) | 0.48    |
|                                                                          | > 24 months                  | 74(26)  | 21(28) | 2.37(0.26-20.95) | 0.43    |
| <b>Kitchen (n=284)</b>                                                   | Enclose Kitchen <sup>1</sup> | 77(27)  | 43(56) | 6.47(3.62-11.56) | <0.0001 |
| <b>Most important fuel for cooking (n=284)</b>                           | Wood                         | 180(63) | 50(28) |                  | 0.730   |

|                                                  |                      |         |        |      |       |
|--------------------------------------------------|----------------------|---------|--------|------|-------|
|                                                  | <b>Charcoal</b>      | 94(33)  | 26(28) |      | 0.725 |
|                                                  | <b>Electricity</b>   | 10(4.0) | 2(20)  | 1.00 |       |
| <b>Stove most often used for cooking (n=284)</b> | <b>Free stones</b>   | 179(63) | 49(27) |      | 0.730 |
|                                                  | <b>Shield stove</b>  | 94(33)  | 26(28) |      | 0.723 |
|                                                  | <b>Grid Electric</b> | 11(3.9) | 2(18)  | 1.00 |       |
| <b>Parental tobacco smoking (n=284)</b>          |                      | 11(3.9) | 2(18)  |      | 0.523 |

<sup>1</sup>Enclosed kitchen= Kitchen with an open fire located inside the house directly connected to the living room and/or the bedrooms

<sup>2</sup>People sleeping in the same room as the child: > 5 years child Sleeping in the same room with the child
