# Supplementary material for: High rate of antibiotic resistance among pneumococci carried by healthy children in the eastern part of the Democratic Republic of the Congo
Source: Springer Nature journal article supplement (doi:10.1186/s12887-018-1332-3), 2018-11-19
Supplement: MOESM5 [file 16279776]

**Additional File 5**

**Medical factors of the children in relation to pneumococcal carriage**

| <b>Medical Factors</b>                        |                                          | <b>N (%)</b> | <b>Pneumococcal carriage N (%)</b> | <b>OR (95% CI)</b> | <b>p-Value</b> |
|-----------------------------------------------|------------------------------------------|--------------|------------------------------------|--------------------|----------------|
| <b>Nutritional status (n=794)</b>             | <b>Under nutrition<sup>1</sup></b>       | 286(36)      | 83(29)                             | 2.18(1.54-3.10)    | <0.0001        |
| <b>Immunization BCG<sup>2</sup> (n = 794)</b> | <b>BCG</b>                               | 783(99)      | 161(21)                            | Fisher test        | 0.998          |
| <b>Immunization Hib<sup>3</sup> (n = 773)</b> | <b>0 dose (n = 773)</b>                  | 55(7.1)      | 5(9.1)                             | 1.00               |                |
|                                               | <b>1 dose (n =773)</b>                   | 77(10)       | 15(20)                             | 2.41(0.82-7.11)    | 0.108          |
|                                               | <b>2 or 3 doses (n = 773)</b>            | 641(83)      | 148(23)                            | 3.01(1.75-7.66)    | 0.021          |
| <b>Immunization PCV13 (n = 773)</b>           | <b>2 or 3 doses (n =646<sup>4</sup>)</b> | 283(44)      | 9(3.2)                             | 1.00               |                |
|                                               | <b>1 dose (n = 773)</b>                  | 159(21)      | 46(29)                             | 12.39(5.87-26.16)  | <0.0001        |
|                                               | <b>0 dose (n= 773)</b>                   | 331(43)      | 108(33)                            | 13.47(6.68-27.17)  | <0.0001        |
| <b>Measles Immunization (n = 431)</b>         | <b>Measles (n = 431)</b>                 | 343(80)      | 84(24)                             | 1.68(0.90-3.13)    | 0.1006         |
| <b>Ongoing symptoms (n=284)</b>               | <b>Fever<sup>5</sup> (n=284)</b>         | 22(7.7)      | 14(64)                             | 5.52(2.21-13.78)   | <0.0001        |
|                                               | <b>Chills (n=284)</b>                    | 21(7.4)      | 6(29)                              | 1.082(0.40-2.89)   | 0.87           |
|                                               | <b>Cough (n=284)</b>                     | 87(31)       | 23(26)                             | 0.95(0.53-1.68)    | 0.86           |
|                                               | <b>Runny nose (n=284)</b>                | 25(8.8)      | 9(36)                              | 1.58(0.67-3.74)    | 0.29           |

|                                             |                                              |         |        |                 |       |
|---------------------------------------------|----------------------------------------------|---------|--------|-----------------|-------|
| <b>Past history of diseases (n=284)</b>     | <b>Malaria (n=284)</b>                       | 41(14)  | 11(27) | 0.98(0.46-2.08) | 0.98  |
|                                             | <b>Gastroenteritis (n=284)</b>               | 43(15)  | 13(30) | 1.19(0.58-2.44) | 0.617 |
|                                             | <b>Neonatal problems<sup>6</sup> (n=284)</b> | 51(18)  | 22(43) | 2.45(1.30-4.61) | 0.004 |
|                                             | <b>Asthma/Bronchiolitis (n=284)</b>          | 14      | 4(29)  | Fisher test     | 0.998 |
|                                             | <b>Others diseases<sup>7</sup> (n=284)</b>   | 31(11)  | 9(29)  | 1.11(0.48-2.53) | 0.789 |
|                                             | <b>HIV (n=284)</b>                           | 00(0.0) | 0.0    |                 |       |
|                                             | <b>Tuberculosis (n=284)</b>                  | 00(0.0) | 0.0    |                 |       |
| <b>Posterior Hospitalization (n=284)</b>    | <b>Heart disease (n=284)</b>                 | 00(0.0) | 0.0    |                 |       |
|                                             |                                              | 74(26)  | 27(36) | 1.83(1.04-3.25) | 0.035 |
| <b>Use of antibiotic last month (n=284)</b> | <b>One month before the sampling</b>         | 55(19)  | 23(42) | 2.32(1.25-4.31) | 0.006 |

<sup>1</sup> Undernutrition defined as

Weight for age or weight for height as a Z score  $\leq -2$  standard deviations, determined by ENA for smart software 2011

<sup>2</sup> BCG =Bacillus Calmette–Guérin vaccine

<sup>3</sup> HiB=*Haemophilus influenzae* type B vaccine

<sup>4</sup> 645 = the number of children that were supposed to be given  $\geq 2$  doses of PCV13 when they were older than 10 weeks or two and a half months.

<sup>5</sup> Fever = 37.5-39.0°C

<sup>6</sup> Neonatal problems = neonatal hospitalisation, neonatal asphyxia or neonatal resuscitation

<sup>7</sup> Other diseases = genetic disorders (sickle cell disease n= 2, Down syndrome n=1), cerebral palsy n=3
